# Supplementary material for: Feline Coronaviruses Identified in Feline Effusions in Suspected Cases of Feline Infectious Peritonitis
Source: MDPI journal article supplement (doi:10.3390/microorganisms9091801), 2021-08-24
Supplement: s1 [file s1]

**Table S1.** FCoV partial spike sequences obtained in this study.

| <b>Virus Name</b> | <b>GenBank Accession Number</b> | <b>Sample Type</b> | <b>Collection Date</b> | <b>FCoV Genotype</b> |
|-------------------|---------------------------------|--------------------|------------------------|----------------------|
| NTUCL43           | MW648553                        | ascites            | Jan-2019               | I                    |
| NTUCL44           | MW648554                        | ascites            | Feb-2019               | I                    |
| NTUCL45           | MW648555                        | ascites            | Apr-2019               | I                    |
| NTUCL46           | MW648556                        | ascites            | June-2019              | I                    |
| NTUCL47           | MW648557                        | ascites            | July-2019              | I                    |
| NTUCL48           | MW648558                        | ascites            | July-2019              | I                    |
| NTUCL49           | MW648559                        | pleural effusion   | July-2019              | I                    |
| NTUCL50           | MW648560                        | ascites            | July-2019              | I                    |
| NTUCL51           | MW648561                        | pleural effusion   | Aug-2019               | I                    |
| NTUCL52           | MW648562                        | ascites            | Aug-2019               | I                    |
| NTUCL53           | MW648563                        | ascites            | Oct-2019               | I                    |
| NTUCL54           | MW648564                        | pleural effusion   | Nov-2019               | I                    |
| NTUCL55           | MW648565                        | ascites            | Dec-2019               | I                    |
| NTUCL56           | MW648566                        | pleural effusion   | Dec-2019               | I                    |
| NTUCL57           | MW648567                        | ascites            | Jan-2020               | I                    |
| NTUCL58           | MW648568                        | ascites            | Jan-2020               | I                    |
| NTUCL59           | MW648569                        | ascites            | Apr-2020               | I                    |
| NTUCL60           | MW648570                        | ascites            | Apr-2020               | I                    |
| NTUCL61           | MW648571                        | pleural effusion   | Apr-2020               | I                    |
| NTUCL62           | MW648572                        | pleural effusion   | May-2020               | I                    |
| NTUCL63           | MW648573                        | ascites            | May-2020               | I                    |
| NTUCL64           | MW648574                        | pleural effusion   | June-2020              | I                    |
| NTUCL65           | MW648575                        | pleural effusion   | June-2020              | I                    |
| NTUCL66           | MW648576                        | ascites            | June-2020              | I                    |
| NTUCL67           | MW648577                        | pleural effusion   | July-2020              | I                    |
| NTUCL68           | MW648578                        | pleural effusion   | July-2020              | I                    |
| NTUCL69           | MW648579                        | ascites            | July-2020              | I                    |
| NTUCL70           | MW648580                        | ascites            | Aug-2020               | I                    |
| NTUCL71           | MW648581                        | ascites            | Sep-2020               | I                    |
| NTUCL72           | MW648582                        | ascites            | Sep-2020               | I                    |
| NTUCL73           | MW648583                        | ascites            | Oct-2020               | I                    |
| NTUCL74           | MW648584                        | ascites            | Oct-2020               | I                    |
| NTUCL75           | MW656200                        | pleural effusion   | Nov-2019               | II                   |
| NTUCL76           | MW656201                        | ascites            | Apr-2020               | II                   |
| NTUCL77           | MW656202                        | pleural effusion   | Apr-2020               | II                   |
| NTUCL78           | MW656203                        | ascites            | May-2020               | II                   |
| NTUCL79           | MW656204                        | pleural effusion   | June-2020              | II                   |
| NTUCL80           | MW656205                        | pleural effusion   | July-2020              | II                   |
| NTUCL81           | MW656206                        | ascites            | July-2020              | II                   |
| NTUCL82           | MW656207                        | ascites            | Aug-2020               | II                   |
| NTUCL83           | MW656208                        | ascites            | Sep-2020               | II                   |

Table S2. Reference sequences used in this study.

| Strain              | Host Species                    | FCoV Genotype | Location  | Genbank Accession Number |
|---------------------|---------------------------------|---------------|-----------|--------------------------|
| NTUCL34             | <i>Felis catus</i>              | I             | Taiwan    | MK736801                 |
| NTUCL13             | <i>Felis catus</i>              | I             | Taiwan    | MK736789                 |
| NTUCL17             | <i>Felis catus</i>              | I             | Taiwan    | MK736792                 |
| BJ/2017/01          | <i>Felis catus</i>              | I             | China     | MG892399                 |
| BJ/2017/07          | <i>Felis catus</i>              | I             | China     | MG892400                 |
| BJ/2015/03          | <i>Felis catus</i>              | I             | China     | MG016685                 |
| HLJ/DQ/2017/08      | <i>Felis catus</i>              | I             | China     | MG892408                 |
| UCD-1               | <i>Felis catus</i>              | I             | Japan     | AB088222                 |
| 08K-958             | <i>Felis catus</i>              | I             | Korea     | JN654404                 |
| 08K-420             | <i>Felis catus</i>              | I             | Korea     | JN654401                 |
| UU5                 | <i>Felis catus</i>              | I             | USA       | FJ938056                 |
| UU54                | <i>Felis catus</i>              | I             | USA       | JN183883                 |
| 20LVIPortugal/06    | <i>Felis catus</i>              | I             | Portugal  | EU327712                 |
| 38LVIPortugal/05B   | <i>Felis catus</i>              | I             | Portugal  | EU327731                 |
| Black               | <i>Felis catus</i>              | I             | Germany   | EU186072                 |
| FECV19              | <i>Felis catus</i>              | I             | Germany   | KJ665866                 |
| FIPV3A              | <i>Felis catus</i>              | I             | Germany   | KJ665871                 |
| 80F                 | <i>Felis catus</i>              | I             | UK        | KP143511                 |
| C1Je                | <i>Felis catus</i>              | I             | UK        | DQ848678                 |
| FCoV/NTU156/P/2007  | <i>Felis catus</i>              | II            | Taiwan    | EU513388                 |
| M91-267             | <i>Felis catus</i>              | II            | Japan     | AB781788                 |
| Tokyo/cat/130627    | <i>Felis catus</i>              | II            | Japan     | AB907634                 |
| 08K-1553            | <i>Felis catus</i>              | II            | Korea     | JN654416                 |
| 08K-656             | <i>Felis catus</i>              | II            | Korea     | JN654413                 |
| WSU 79-1683         | <i>Felis catus</i>              | II            | USA       | JN634064                 |
| 79-1146             | <i>Felis catus</i>              | II            | UK        | DQ010921                 |
| CFBCoV/DM95/2003    | <i>Malva moschata</i>           |               | China     | EF192156                 |
| CCoV B906_ZJ_2019   | <i>Canis lupus</i>              |               | China     | MT114554                 |
| TGEV FS-WS          | <i>Sus scrofa</i>               |               | China     | MK272773                 |
| GZ43/2003           | <i>Nyctereutes procyonoides</i> |               | Hong Kong | EF192155                 |
| CCoV/dog/HCM47/2015 | <i>Canis lupus</i>              |               | Japan     | LC190907                 |
